# Supplementary material
Source: PubMed Central journal article supplement (PMC6275982)
Supplement: 11658_2013_89_MOESM1_ESM.pdf [file 11658_2013_89_MOESM1_ESM.pdf]

## Supplementary material

**ENHANCEMENT OF WOUND CLOSURE IN DIABETIC MICE  
BY *ex vivo* EXPANDED CORD BLOOD CD34<sup>+</sup> CELLS**KAMONNAREE CHOTINANTAKUL<sup>1,2</sup>, CHAVABOON DECHSUKHUM<sup>3,4</sup>,  
DUANGNAPA DEJJUY<sup>1,2</sup> and WILAIRAT LEEANANSAKSIRI<sup>1,2</sup><sup>1</sup>Stem Cell Therapy and Transplantation Research Group, Suranaree University of Technology, Thailand, <sup>2</sup>School of Microbiology, Institute of Science, Suranaree University of Technology, Thailand, <sup>3</sup>Gene Therapy and Clinical Application Research Group, Suranaree University of Technology, Thailand, <sup>4</sup>School of Pathology, Institute of Medicine, Suranaree University of Technology, Thailand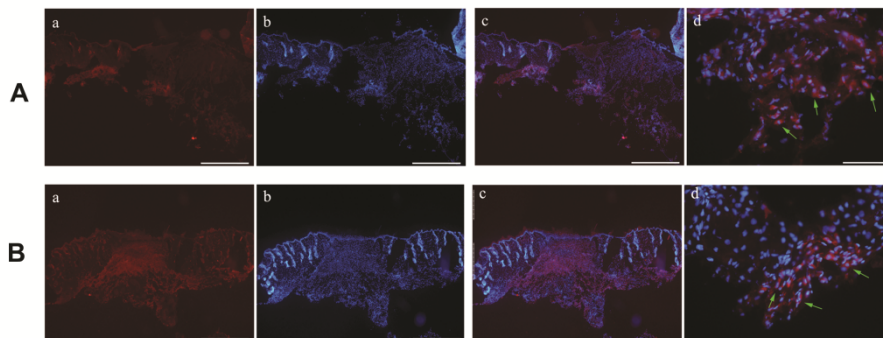

Suppl. Fig. 1. Localization of freshly isolated CB-CD34<sup>+</sup> cells in the wounds after engraftment. (a) Immunofluorescent staining for human CB-CD34<sup>+</sup> cells in wound tissues injected with freshly isolated CB-CD34<sup>+</sup> cells on days 5 (A) and 9 (B) of the treatment. Counterstaining of nuclei with DAPI on the same sections (b) and overlay images (c) are shown in the same row. Scale bar = 400  $\mu\text{m}$ . (d) High magnification images. The arrows indicate CB-CD34<sup>+</sup> cells. Scale bar = 80  $\mu\text{m}$ .

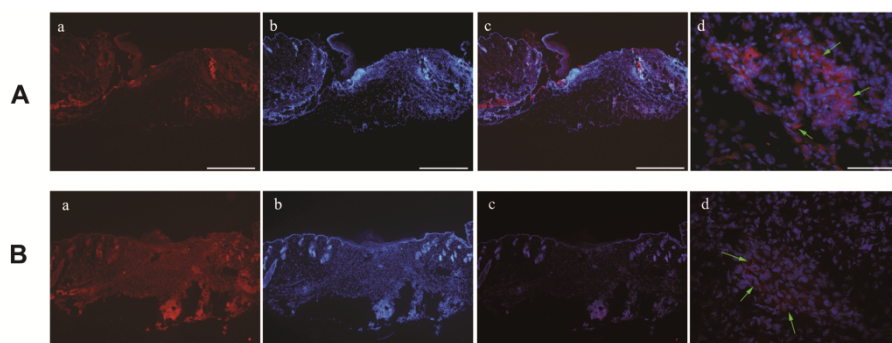

Suppl. Fig. 2. Localization of expanded CB-CD34<sup>+</sup> cells in the wounds after engraftment. (a) Immunofluorescent staining for human CB-CD34<sup>+</sup> cells in wound tissues injected with expanded CB-CD34<sup>+</sup> cells on days 5 (A) and 9 (B) of the treatment. Counterstaining of nuclei with DAPI on the same sections (b) and overlay images (c) are shown in the same row. Scale bar = 400  $\mu$ m. (d) High magnification images. The arrows indicated CB-CD34<sup>+</sup> cells. Scale bar = 80  $\mu$ m.

Suppl. Table 1. Complete results of pathology examination of organs and distribution of human CB-CD34<sup>+</sup> cells in the mice that received transplantation treatment.

| Organs                        | Pathology results/Presence of human CD34 <sup>+</sup> cells |                                             |                         |             |
|-------------------------------|-------------------------------------------------------------|---------------------------------------------|-------------------------|-------------|
|                               | Expanded CB-CD34 <sup>+</sup> cells                         | Freshly isolated CB-CD34 <sup>+</sup> cells | Cytokine cocktail alone | PBS control |
| Liver                         | Normal/No                                                   | Normal/No                                   | Normal/No               | Normal/No   |
| Spleen                        | Normal/No                                                   | Normal/No                                   | Normal/No               | Normal/No   |
| Pancreas                      | Normal/No                                                   | Normal/No                                   | Normal/No               | Normal/No   |
| Right kidney                  | Normal/No                                                   | Normal/No                                   | Normal/No               | Normal/No   |
| Left kidney                   | Normal/No                                                   | Normal/No                                   | Normal/No               | Normal/No   |
| Adrenal gland                 | Normal/No                                                   | Normal/No                                   | Normal/No               | Normal/No   |
| Mesentery                     | Normal/No                                                   | Normal/No                                   | Normal/No               | Normal/No   |
| Stomach and esophagus         | Normal/No                                                   | Normal/No                                   | Normal/No               | Normal/No   |
| Small intestine               | Normal/No                                                   | Normal/No                                   | Normal/No               | Normal/No   |
| Large intestine               | Normal/No                                                   | Normal/No                                   | Normal/No               | Normal/No   |
| Right lung                    | Normal/No                                                   | Normal/No                                   | Normal/No               | Normal/No   |
| Left lung                     | Normal/No                                                   | Normal/No                                   | Normal/No               | Normal/No   |
| Heart                         | Normal/No                                                   | Normal/No                                   | Normal/No               | Normal/No   |
| Bladder                       | Normal/No                                                   | Normal/No                                   | Normal/No               | Normal/No   |
| Left and right prostate gland | Normal/No                                                   | Normal/No                                   | Normal/No               | Normal/No   |
| Right brain hemisphere        | Normal/No                                                   | Normal/No                                   | Normal/No               | Normal/No   |
| Left brain hemisphere         | Normal/No                                                   | Normal/No                                   | Normal/No               | Normal/No   |
| Left and right eyes           | Normal/No                                                   | Normal/No                                   | Normal/No               | Normal/No   |
| Bone marrow and femurs        | Normal/No                                                   | Normal/No                                   | Normal/No               | Normal/No   |
